# Supplementary material for: Mechanical Properties of Polyethylene‐Carbon Nanotube Composites Synthesized by In Situ Polymerization Using Metallocene Catalysts
Source: Hindawi journal article supplement (doi:10.1155/2018/4057282), 2018-01-01
Supplement: f1 [file 4057282.f1.docx]

Supplementary materials

**Mechanical properties of polyethylene-carbon nanotube composites synthesized by *in-situ* polymerization using metallocene catalysts**

**Mamdouh A. Al-Harthi2,3, Bijal Kottukkal Bahuleyan1***

*1* Department of General Studies, Yanbu Industrial College, P.O. Box 30436, Saudi Arabia.

*2Department of Chemical Engineering, King Fahd University of Petroleum and Minerals, 31261 Dhahran, Saudi Arabia.*

*3Center of Excellence in Nanotechnology, King Fahd University of Petroleum and Minerals, 31261 Dhahran, Saudi Arabia.*

*****Corresponding Author:

Bijal Kottukkal Bahuleyan (bijal[@rcyci.edu.sa](mailto:mamdouh@kfupm.edu.sa), Phone: +966-550221036 Fax: +966 8604234)

**Contents**

**S1:** 1H NMR spectrum for neat PE sample

**S2:**1H NMR spectrum of PE-CNT nanocomposites.


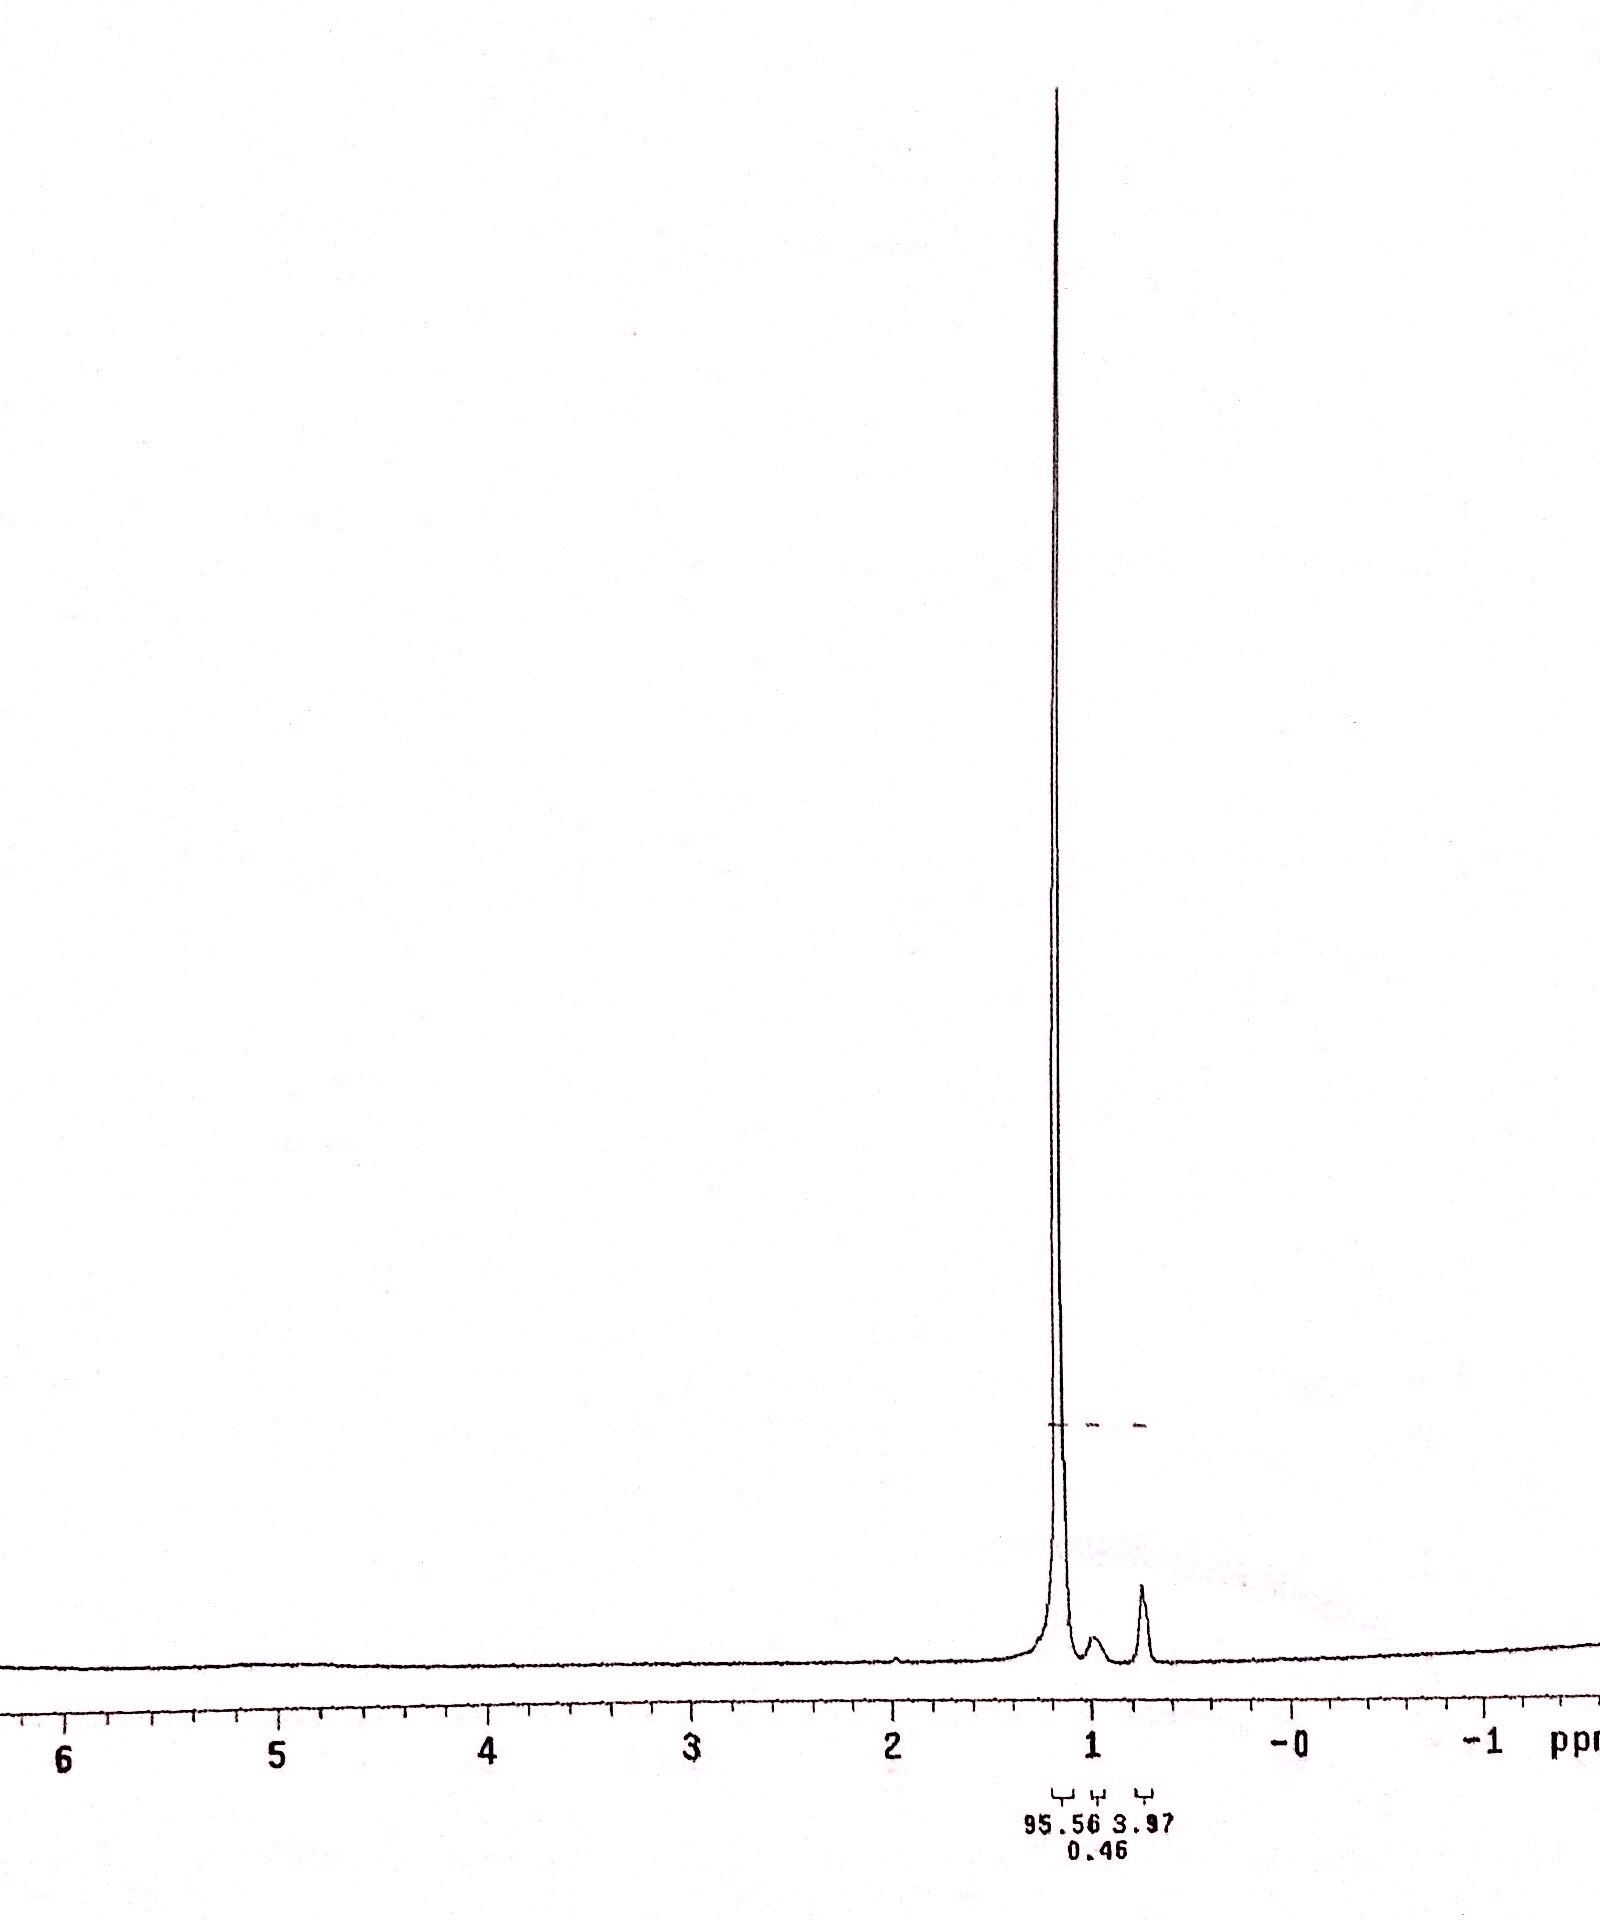


**Figure S1**. 1H NMR spectrum for neat PE sample


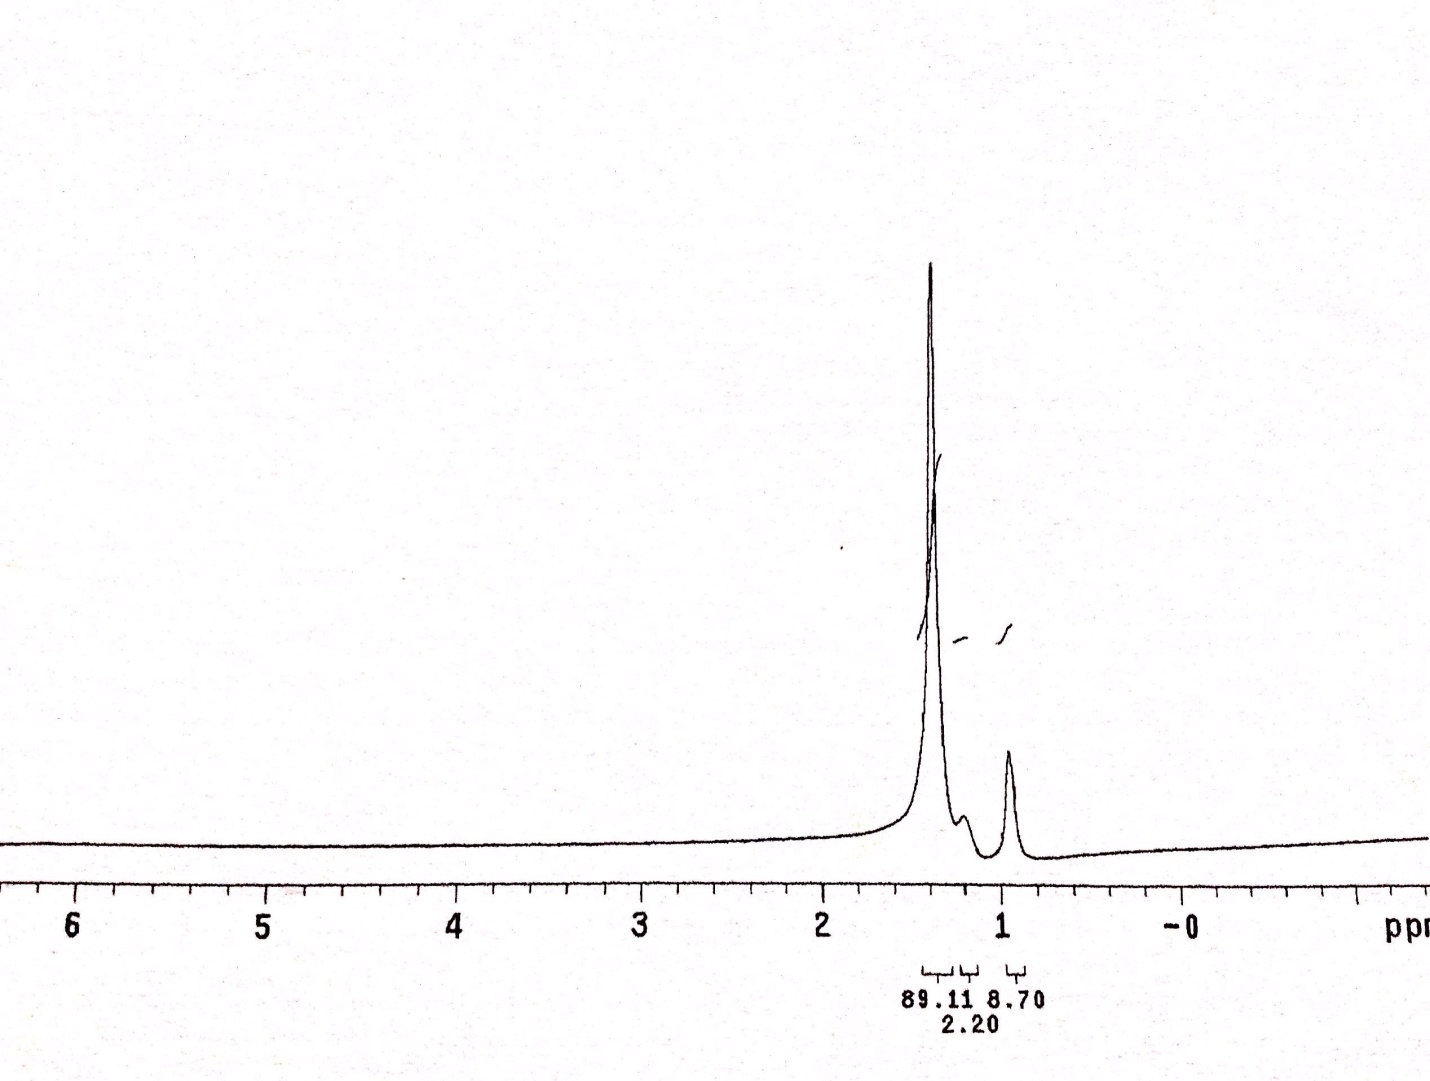


**Figure S2**. 1H NMR spectrum of PE-CNT nanocomposites.
